# Supplementary material
Source: Springer Nature journal article supplement (https://www.springermedizin.de/resource/supplementary/12985_2010_889_MOESM2_ESM.pdf/9608672)
Supplement: MOESM2 [file 9608672]

BP53  
Pacifastacus\_leniusculus  
MLGAAQRACSTILKAAKPAVVSKGLQNVGSKTLPALYTQCRRNYAAKAEA 50  
MLGAAARACSSVLKAAKPAVASLSLQNGGARITVPVAVYTAHRNYAAKAEA 50  
\*\*\*\*\*:\*\*\*\*\*.\* \*\* \*:\*\*\*:\*\*\*:\*\*\*\*\*

BP53  
Pacifastacus\_leniusculus  
TQTGVANGSVVAVIGAVVDVQFDGELPPIILNALEVANRSPRLVLEVAQHL 100  
TQTGVATGKVVAVIGAVVDVQFEGELPPIILNSLEVENRTPRLVLEVAQHL 100  
\*\*\*\*\*.\*:\*\*\*\*\*:\*\*\*\*\*:\*\*\* \*:\*\*\*\*\*

BP53  
Pacifastacus\_leniusculus  
GENTVTRIAMDGTEGLIRGNNAVVDIGSPISIFVPGPTLGRIINVIGEPID 150  
GENTVTRIAMDGTEGLVRGNNAVVDIGSPISIFVPGPTLGRIINVIGEPID 150  
\*\*\*\*\*:\*\*\*\*\*

BP53  
Pacifastacus\_leniusculus  
ERGPPIPIEHSALHAEAPDFVEMSVQEILVIGIKVVDLLAPYSKGGKIG 200  
ERGPVPIEFYSALHAEAPDFVNMVSVQEILVIGIKVVDLLAPYSKGGKIG 200  
\*\*\*:\*\*\*.:\*\*\*\*\*:\*\*\*\*\*

BP53  
Pacifastacus\_leniusculus  
LFGGAGVGKTVLIMELINNVAKAHDGYSVFAGVGERTRGNDLYHEMIES 250  
LFGGAGVGKTVLIMELINNVAKAHGGYSVFAGVGERTRGNDLYHEMIES 250  
\*\*\*\*\*

BP53  
Pacifastacus\_leniusculus  
GVISLKDDTSKVS LVYQGMNEPPGARARVALTGLTVAEYFRDQEGQDVLL 300  
GVISLKDDTSKVS LVYQGMNEPPGARARVALTGLTVAEYFRDQEGQDVLL 300  
\*\*\*\*\*

BP53  
Pacifastacus\_leniusculus  
FIDNIFRFTQAGSEVSALLGRIPSAVGYQPTLATDMGSMQERITTTKKG 350  
FIDNIFRFTQAGSEVSALLGRIPSAVGYQPTLATDMGTHQERITTTKKG 350  
\*\*\*\*\*:\*\*\*\*\*

BP53  
Pacifastacus\_leniusculus  
ITSVQAIYVPADDLTDPA PATTFAHLDATTVLSRGIAELGIYPAVDPLDS 400  
ITSVQAIYVPADDLTDPA PATTFAHLDATTVLSRGIAELGIYPAVDPLDS 400  
\*\*\*\*\*

BP53  
Pacifastacus\_leniusculus  
ISRIMDANIIGHEHYNVARSVQKILQDHKSLQDI IAILGMDELSEEDKLT 450  
ISRIMDPNIIGAEHYNVARAVQKILQDQHKSLQDI IAILGMDELSEEDKLT 450  
\*\*\*\*\*.\* \*\* \*:\*\*\*\*\*:\*\*\*\*\*

BP53  
Pacifastacus\_leniusculus  
VARARKIQKFLSQPFQVAEVFTGYSGKVFVSLPDTIRSFKEILAGKYDDL 500  
VARARKIQKFLSQPFQVAEVFTGYSGKVFVSLKTIASFKEILAGKYDHL 500  
\*\*\*\*\*.\* \*\* \*:\*\*\*\*\*.\*

BP53  
Pacifastacus\_leniusculus  
EAFYMQGSIEDVIEKAEQLAAQAS 525  
KLPSTCRGDIQDVLEKAEQLATQGS 525  
: . ;\*.\*:\*\*\*:\*\*\*\*\*:\*.\*
